# Supplementary material for: Association between NDRG1 protein expression and aggressive features of breast cancer: a systematic review and meta-analysis
Source: Springer Nature journal article supplement (doi:10.1186/s12885-023-11517-7), 2023-10-19
Supplement: MOESM3 [file 26202058]

# Association between NDRG1 protein expression and aggressive features of breast cancer: A systematic review and meta-analysis

Kwuntida Kotepui<sup>1</sup>, Manas Kotepui<sup>1\*</sup>, Hideyuki J. Majima<sup>1</sup>, Jitbanjong Tangpong<sup>1</sup>

<sup>1</sup>Medical Technology, School of Allied Health Sciences, Walailak University, Tha Sala, Nakhon Si Thammarat, Thailand

## \*Corresponding author

Manas Kotepui: manas.ko@wu.ac.th

## Supplementary Figures

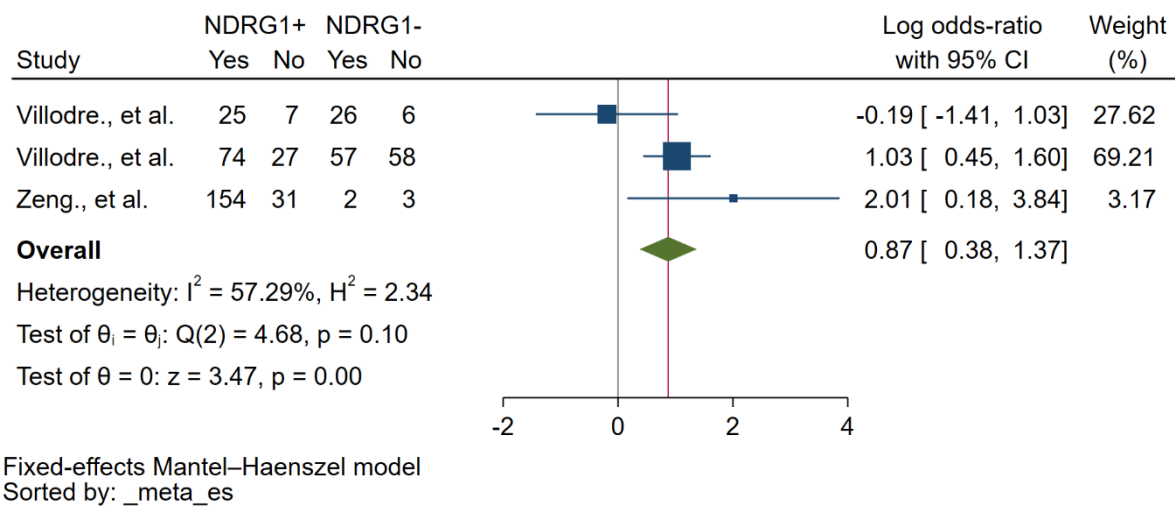

**Supplementary Figure 1.** The association between NDRG1 protein expression and aggressive features of breast cancer according to the fixed-effects model.

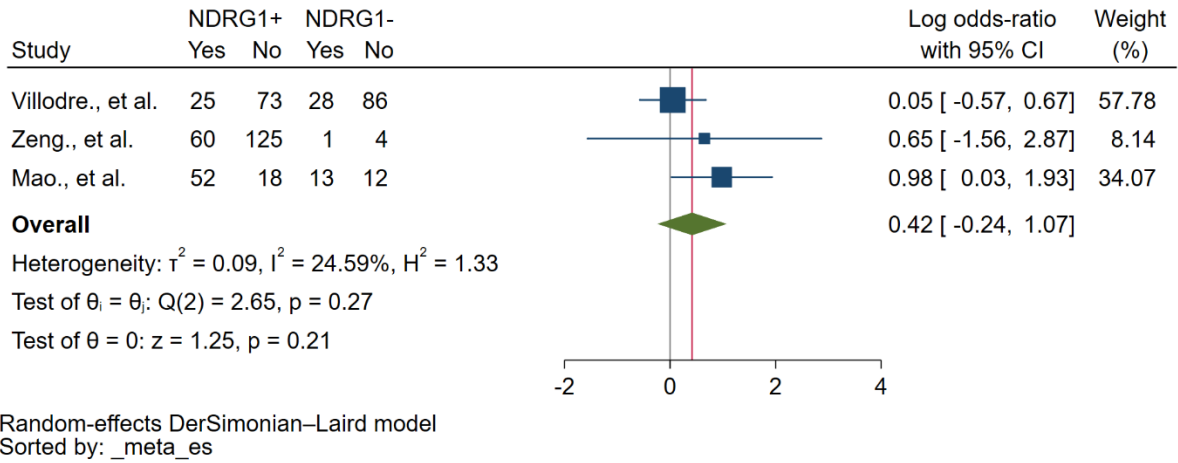

**Supplementary Figure 2.** The association between NDRG1 protein expression and tumor stage was identified according to the random effects model.

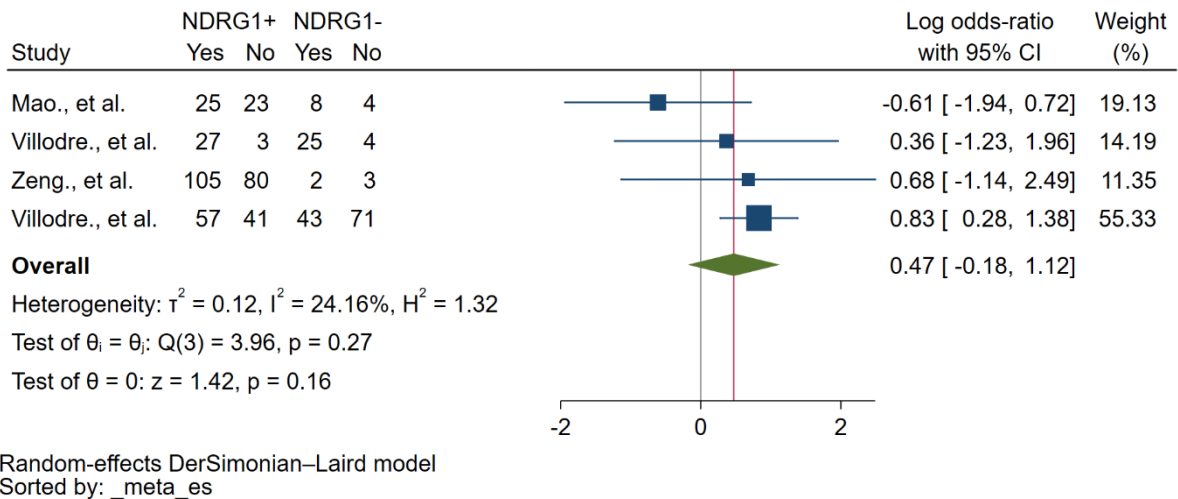

**Supplementary Figure 3.** The association between NDRG1 protein expression and axillary lymph node metastasis according to the random effects model.

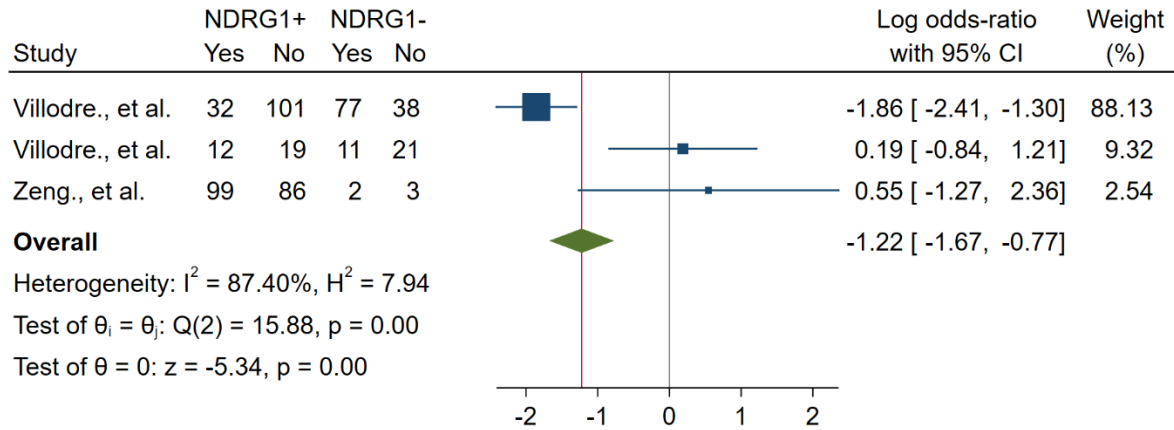

Fixed-effects Mantel–Haenszel model  
 Sorted by: `_meta_es`

**Supplementary Figure 4.** The association between NDRG1 protein expression and ER status according to the random effects model.

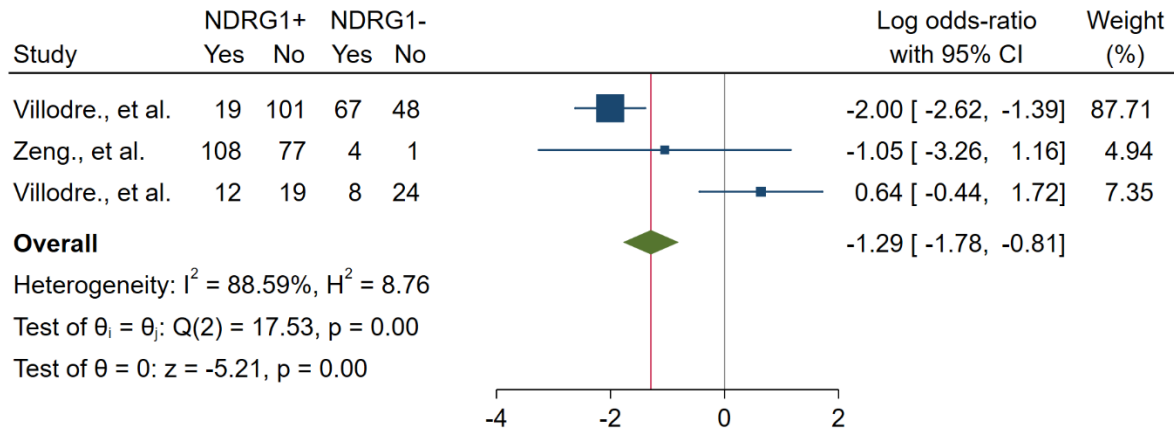

Fixed-effects Mantel–Haenszel model  
 Sorted by: `_meta_es`

**Supplementary Figure 5.** The association between NDRG1 protein expression and PR status according to the fixed-effects model.

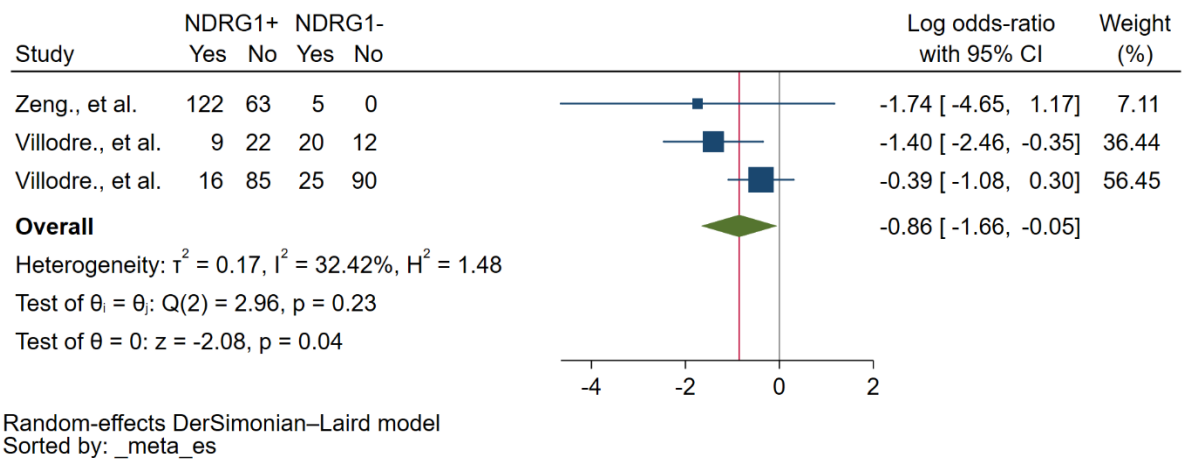

**Supplementary Figure 6.** The association between NDRG1 protein expression and Her2 status according to the random effects model.
