# Supplementary material for: Association between NDRG1 protein expression and aggressive features of breast cancer: a systematic review and meta-analysis
Source: BMC Cancer. 2023 Oct 19;23:1003. doi: 10.1186/s12885-023-11517-7 (PMC10585795; doi:10.1186/s12885-023-11517-7)
Supplement: Supplementary file 2 — Supplementary Material 2 [file 12885_2023_11517_MOESM2_ESM.xls]

## Sheet: Cross-sectional studies
Table S2. Risk of bias
JBI CRITICAL APPRAISAL CHECKLIST FOR ANALYTICAL CROSS SECTIONAL STUDIES
No.	Study	1. Were the criteria for inclusion in the sample clearly defined?	2. Were the study subjects and the setting described in detail?	3. Was the exposure measured in a valid and reliable way?	4. Were objective, standard criteria used for measurement of the condition?	5. Were confounding factors identified?	6. Were strategies to deal with confounding factors stated?	7. Were the outcomes measured in a valid and reliable way?	8. Was appropriate statistical analysis used?	Overall appraisal:
1	Nagai et al., 2011	Yes	Unclear	Yes	Yes	Yes	Yes	Yes	Yes	Include
2	Villodre et al., 2022	Yes	Unclear	Yes	Yes	No	No	Yes	Yes	Include

## Sheet: Cohort studies
CHECKLIST FOR COHORT STUDIES
No.	Study	1. Were the two groups similar and recruited from the same population?	2. Were the exposures measured similarly to assign people to both exposed and unexposed groups?	3. Was the exposure measured in a valid and reliable way?	4. Were confounding factors identified?	5. Were strategies to deal with confounding factors stated?	6. Were the groups/participants free of the outcome at the start of the study (or at the moment of exposure)?	7. Were the outcomes measured in a valid and reliable way?	8. Was the follow up time reported and sufficient to be long enough for outcomes to occur?	9. Was follow up complete, and if not, were the reasons to loss to follow up described and explored?	10. Were strategies to address incomplete follow up utilized?	11. Was appropriate statistical analysis used?	Overall appraisal:
1	López-Tejada et al., 2023	Yes	unclear	Yes	No	No	Yes	Yes	unclear	unclear	unclear	Yes	Include
2	Zeng et al., 2019	Yes	Yes	Yes	Yes	Yes	Yes	Yes	Yes	Yes	unclear	Yes	Include
3	Mao et al., 2011	Yes	Yes	Yes	No	No	Yes	Yes	Yes	Yes	unclear	Yes	Include
4	Villodre et al., 2020	Yes	Yes	Yes	No	No	Yes	Yes	Yes	Yes	unclear	Yes	Include
